# Supplementary material for: Host Barriers Limit Viral Spread in a Spillover Host: A Study of Deformed Wing Virus in the Bumblebee Bombus terrestris
Source: MDPI journal article supplement (doi:10.3390/v16040607), 2024-04-15
Supplement: s1 [file s1]

## Supplementary material to:

### Title: **Host barriers limit viral spread in a spillover host: a study of deformed wing virus in the bumble bee *Bombus terrestris***

Authors: Tabea Streicher<sup>1</sup>, Pina Brinker<sup>1,2</sup>, Simon Tragust<sup>1</sup>, and Robert J. Paxton<sup>1,2</sup>

<sup>1</sup> General Zoology, Institute for Biology, Martin Luther University Halle-Wittenberg, Hoher Weg 8, 06120 Halle (Saale), Germany

<sup>2</sup> German Centre for Integrative Biodiversity Research (iDiv) Halle-Jena-Leipzig, Puschstraße 4, 04103 Leipzig, Germany

Submitted to: *Viruses* MDPI

Content:

- **Table S1** Colony screening results for six common honey bee viruses
- **Table S2** Raw data on samples and PCR results underpinning Figures 1, 2 and 3 (main manuscript).
- **Table S3** Results of capillary electrophoresis to identify one-step RT-PCR products of haemolymph from bumble bees and honey bees fed DWV-B
- **Figure S1** Electropherograms of one-step RT-PCR products of haemolymph from bumble bees and honey bees fed DWV-B
- **Table S4** Screening pollen viruses

**Table S1** Colony screening results of experimental *A. mellifera* and *B. terrestris* colonies for six common honey bee viruses, undertaken by real-time PCR. Samples were run in technical duplicates. N/A = negative. Honey bee beta-actin served as a quality control internal 'reference' for RNA extraction and cDNA synthesis.

| Colony                           | Actin          | DWV-A      | DWV-B        | BQCV           | SBV        | SBPV       | CBPV       |
|----------------------------------|----------------|------------|--------------|----------------|------------|------------|------------|
| <i>A. mellifera</i><br>R25       | 27.26<br>-     | N/A<br>N/A | 37.35<br>N/A | 39.35<br>37.79 | N/A<br>N/A | N/A<br>N/A | N/A<br>N/A |
| <i>B. terrestris</i><br>Colony 1 | 23.46<br>23.04 | N/A<br>N/A | N/A<br>N/A   | N/A<br>N/A     | N/A<br>N/A | N/A<br>N/A | N/A<br>N/A |
| <i>B. terrestris</i><br>Colony 2 | 23.38<br>23.17 | N/A<br>N/A | N/A<br>N/A   | N/A<br>N/A     | N/A<br>N/A | N/A<br>N/A | N/A<br>N/A |
| <i>B. terrestris</i><br>Colony 3 | 22.78<br>22.66 | N/A<br>N/A | N/A<br>N/A   | N/A<br>N/A     | N/A<br>N/A | N/A<br>N/A | N/A<br>N/A |
| <i>B. terrestris</i><br>Colony 4 | 23.59<br>23.49 | N/A<br>N/A | N/A<br>N/A   | N/A<br>N/A     | N/A<br>N/A | N/A<br>N/A | N/A<br>N/A |
| <i>B. terrestris</i><br>Colony 5 | 23.48<br>23.50 | N/A<br>N/A | N/A<br>N/A   | N/A<br>N/A     | N/A<br>N/A | N/A<br>N/A | N/A<br>N/A |
| <i>B. terrestris</i><br>Colony 6 | 19.42<br>19.53 | N/A<br>N/A | N/A<br>N/A   | N/A<br>N/A     | N/A<br>N/A | N/A<br>N/A | N/A<br>N/A |
| <i>B. terrestris</i><br>Colony 7 | 21.59<br>21.47 | N/A<br>N/A | N/A<br>N/A   | N/A<br>N/A     | N/A<br>N/A | N/A<br>N/A | N/A<br>N/A |
| <i>B. terrestris</i><br>Colony 8 | 24.67<br>24.31 | N/A<br>N/A | N/A<br>N/A   | N/A<br>N/A     | N/A<br>N/A | N/A<br>N/A | N/A<br>N/A |

The Excel file is available at: [link article doi](#)

[illegible]

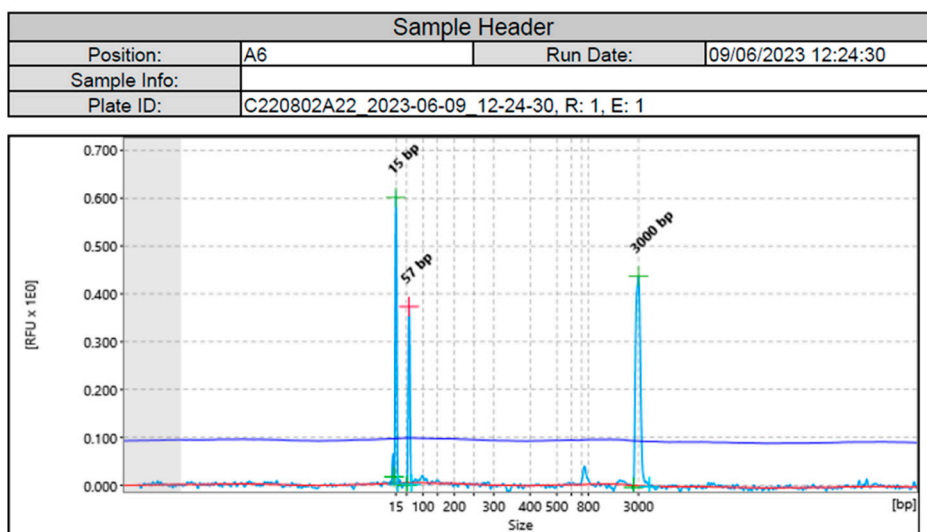

**Fig. S1a** Haemolymph of a control-fed *B. terrestris* worker (lane A6)

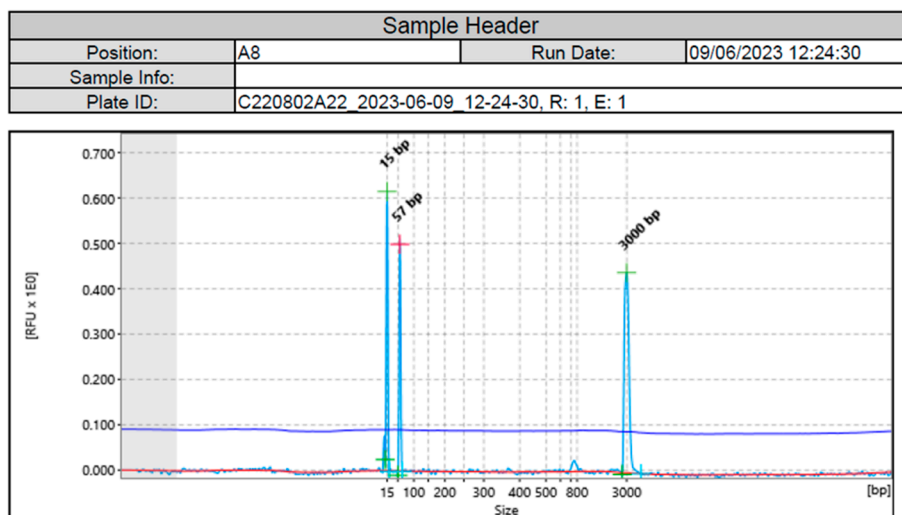

**Fig. S1b** Haemolymph of a control-fed *A. mellifera* worker (lane A8)

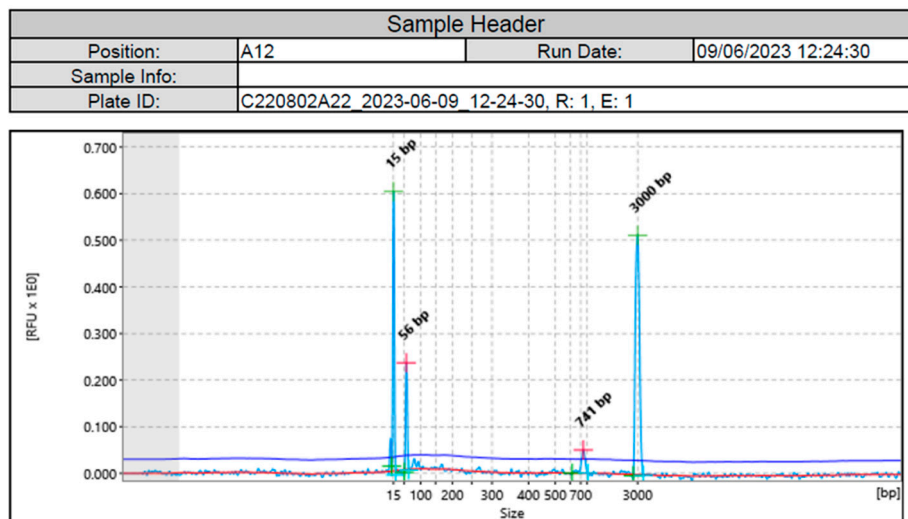

**Fig. S1c** Haemolymph of a DWV-B-fed *B. terrestris* worker (lane A12)

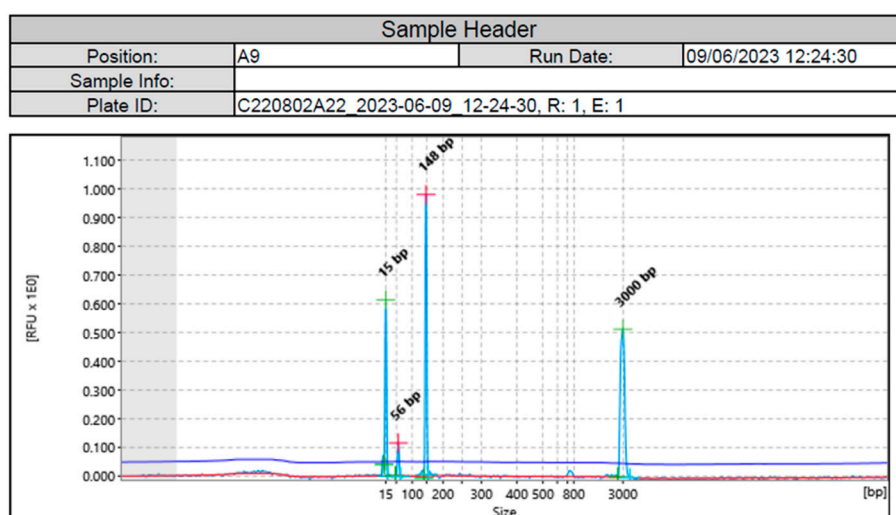

**Fig. S1d** Haemolymph of a DWV-B-fed *A. mellifera* worker (lane A9)

**Figure S1** Electropherograms of PCR products using haemolymph as template, collected from control-fed *B. terrestris* (**1a**), and *A. mellifera* (**1b**) workers and DWV-B-fed *B. terrestris* (**1c**) and *A. mellifera* (**1d**) workers (data presented in Table S3). All samples show a PCR product with a length of 56-57 bp when tested for the presence of DWV-B, likely due to primer dimerization, indicated through the short fragment length. DWV-B was detected only in DWV-B-fed *A. mellifera* (**1d**: a product length of 148 bp), while no DWV-B was detected in the hemolymph of a DWV-B-fed *B. terrestris* (**1c**).

**Table S4** Results (Cq value) of honey bee pollen screening for DWV-A, DWV-B and BQCV by RT-PCR. Commercially available honey bee pollen regularly carries bee viruses. Shown are two different pollen batches; gamma irradiated pollen from Great Britain and non-irradiated pollen from Austria. The latter was used to feed *Bombus terrestris* colonies in the laboratory as a source of bumble bees for our experiments.

| Pollen sample                | DWV-A | DWV-B | BQCV  |
|------------------------------|-------|-------|-------|
|                              |       |       |       |
| <b>gamma irradiated</b>      |       |       |       |
| pollen sample a              | N/A   | N/A   | N/A   |
| (technical duplicate of a)   | N/A   | N/A   | N/A   |
| pollen sample b              | N/A   | N/A   | N/A   |
| (technical duplicate of b)   | N/A   | N/A   | N/A   |
| pollen sample c              | N/A   | 39.10 | 38.02 |
| (technical duplicate of c)   | N/A   | 37.93 | 38.31 |
| pollen sample d              | N/A   | N/A   | N/A   |
| (technical duplicate of d)   | N/A   | N/A   | N/A   |
|                              |       |       |       |
| <b>non-irradiated pollen</b> |       |       |       |
| pollen sample 1              | 37.01 | N/A   | 23.78 |
| pollen sample 2              | 37.02 | N/A   | 28.75 |
| pollen sample 3              | 39.20 | N/A   | 30.04 |
| pollen sample 4              | 37.13 | 38.62 | 30.04 |
