# Supplementary material for: Host Barriers Limit Viral Spread in a Spillover Host: A Study of Deformed Wing Virus in the Bumblebee Bombus terrestris
Source: Viruses. 2024 Apr 15;16(4):607. doi: 10.3390/v16040607 (PMC11053533; doi:10.3390/v16040607)
Supplement: Supplementary file 1 [file viruses-16-00607-s001.zip › Supplementary Table S2 Real-time PCR results Streicher et al..xlsx]

## Sheet: Metadata
Overview:
Data to Figure 1	Results of one-step RT-PCR for the detection of DWV-B in the feaces of bumble bees and honey bees after oral inoculation by feeding of DWV-B
Data to Figure 2	Results of one-step RT-PCR for the detection of DWV-B in the feaces of bumble bees and honey bees after injection of DWV-B in the hemocoel
Data to Figure 3	Results of one-step RT-PCR for the detection of DWV-B in the heamolymph of bumble bees and honey bees after oral inoculation by feeding of DWV-B
	Additionally, the sheet Data to Figure 3 includes heamolymph samples collected from bees shortly after the injection of DWV-B into the hemocoel to verify the detection method for Apis and Bombus
Explanation of table contents:
Header	Description
Sample name	Sample ID used throughout the data analysis
Species	Species name of the inoculated host species (Apis mellifera or Bombus terrestris)
Treatment	Routes of virus exposure, either oral inoculation by feeding or injection of virus into the bee's heamocoel
Inoculation date	Date of virus inoculation
Time point	Three different time points post virus inoculation were analysed to follow virus spread over time
dpi	Days post infection
Sampling date	Date on which samples were collected
Sample type	Haemolymph or faeces collected from bumble bees and honey bees
Volume faeces	Volume of collected feacal sample that was used for RNA extraction (2-20 µL)
Volume buffer	Volume of buffer used for 1:10 dilutions of the feacal sample for RNA extraction
DWV-B Cqmean	mean Cq of DWV-B
CqStdDev	Standard deviation among the Cq values of two technical replicates per sample
Melt temperature	Melting temperature of the PCR product (DWV-B: 78.5°C)

## Sheet: Raw data Fig. 1
Data Fig.1:
Sample name	Species	Treatment	Inoculation date	Time point	dpi	Sampling date	Sample type	Volume faeces	Volume buffer	DWV-B Cqmean	CqStdDev	Melt temperature
ACDF F1	Apis mellifera	Control fed	2022-08-23	T1	2	2022-08-25	faeces	2	18	34.18	0.319	78.5
ACDF F2	Apis mellifera	Control fed	2022-08-23	T1	2	2022-08-25	faeces	3	27	34.41	0	79
ACDF F3	Apis mellifera	Control fed	2022-08-23	T1	2	2022-08-25	faeces	6	54	35.2	0	77.5
ACDF F4	Apis mellifera	Control fed	2022-08-23	T2	6	2022-08-29	faeces	3	27	35.74	0	78.5
ACDF F5	Apis mellifera	Control fed	2022-08-23	T2	6	2022-08-29	faeces	6	54	35.51	1.58	78.5
ACDF F6	Apis mellifera	Control fed	2022-08-23	T2	6	2022-08-29	faeces	20	180	35.89	0	78.5
ADF F1	Apis mellifera	DWV-B fed	2022-08-23	T1	2	2022-08-25	faeces	6	54	17.09	0.165	78.5
ADF F2	Apis mellifera	DWV-B fed	2022-08-23	T1	2	2022-08-25	faeces	6	54	18.43	0.424	78.5, 78.0
ADF F3	Apis mellifera	DWV-B fed	2022-08-23	T1	2	2022-08-25	faeces	3	27	18.57	0.085	78.5
ADF F4	Apis mellifera	DWV-B fed	2022-08-23	T2	6	2022-08-29	faeces	9	81	14.11	0.037	78.5, 78.0
ADF F5	Apis mellifera	DWV-B fed	2022-08-23	T2	6	2022-08-29	faeces	6	54	13.66	0.127	78.5, 79.0
ADF F6	Apis mellifera	DWV-B fed	2022-08-23	T2	6	2022-08-29	faeces	9	81	14.71	0.014	78
positive control: Faeces from untreated Bombus spiked with 5x107 GEs. Cq = 13.08; Tm = 78.5
CWF F1	Bombus terrestris	Control fed	2022-09-19	T1	3	2022-09-22	faeces	2	18	36.35	0	78.5
CWF F2	Bombus terrestris	Control fed	2022-09-19	T1	3	2022-09-22	faeces	2.5	22.5	35.56	0.611	78.5
CWF F3	Bombus terrestris	Control fed	2022-09-19	T3	10	2022-09-29	faeces	9	81	34.83	0	78.5
CWF F4	Bombus terrestris	Control fed	2022-09-19	T3	10	2022-09-29	faeces	8	72	35.99	0	78.5
DWF F1	Bombus terrestris	DWV-B fed	2022-09-19	T1	3	2022-09-22	faeces	2	18	29.1	0.048	78.5
DWF F2	Bombus terrestris	DWV-B fed	2022-09-19	T1	3	2022-09-22	faeces	20	180	25.98	0.043	78.5
DWF F3	Bombus terrestris	DWV-B fed	2022-09-19	T3	10	2022-09-29	faeces	3	27	31.16	0.053	78.5
DWF F4	Bombus terrestris	DWV-B fed	2022-09-19	T3	10	2022-09-29	faeces	10	90	25.26	0.043	78.5

## Sheet: Raw data Fig. 2
Data Fig.2:
Sample name	Species	Treatment	Inoculation date	Time point	dpi	Sampling date	Sample type	Volume faeces	Volume buffer	DWV-B Cqmean	CqStdDev	Melt temperature
ADIC F1	Apis mellifera	Control injected	2022-08-24	T1	2	2022-08-26	faeces	3	27	N/A	-	-
ADIC F2	Apis mellifera	Control injected	2022-08-24	T1	2	2022-08-26	faeces	6	54	34.62	0.745	78, 78.5
ADIC F3	Apis mellifera	Control injected	2022-08-24	T1	2	2022-08-26	faeces	7	63	33.69	2.969	78, 78.5
ADIC F4	Apis mellifera	Control injected	2022-08-24	T2	6	2022-08-30	faeces	20	180	34.14	0.591	78.5
ADIC F5	Apis mellifera	Control injected	2022-08-24	T2	6	2022-08-30	faeces	6	54	33.73	0.022	78.5
ADIC F6	Apis mellifera	Control injected	2022-08-24	T2	6	2022-08-30	faeces	7	63	31.43	0.175	78.5
ADIC F7	Apis mellifera	Control injected	2022-08-24	T3	10	2022-09-03	faeces	20	180	34	0.361	78.5
ADIC F8	Apis mellifera	Control injected	2022-08-24	T3	10	2022-09-03	faeces	20	180	34.82	0.487	78
ADIC F9	Apis mellifera	Control injected	2022-08-24	T3	10	2022-09-03	faeces	20	180	32.77	0.569	78.5
ADIC F10	Apis mellifera	Control injected	2022-08-24	T3	10	2022-09-03	faeces	20	180	36.33	0	79
ADI+ F1	Apis mellifera	DWV-B injected	2022-08-24	T1	2	2022-08-26	faeces	7	63	29.29	0.176	78.5
ADI+ F2	Apis mellifera	DWV-B injected	2022-08-24	T1	2	2022-08-26	faeces	5	45	29.43	0.079	78.5
ADI+ F3	Apis mellifera	DWV-B injected	2022-08-24	T1	2	2022-08-26	faeces	5	45	30.82	0.044	78.5
ADI+ F4	Apis mellifera	DWV-B injected	2022-08-24	T2	6	2022-08-30	faeces	12	108	16.11	0.061	78.5
ADI+ F5	Apis mellifera	DWV-B injected	2022-08-24	T2	6	2022-08-30	faeces	6	54	16.17	0.001	78.5
ADI+ F6	Apis mellifera	DWV-B injected	2022-08-24	T2	6	2022-08-30	faeces	12	108	15.6	0.029	78.5
ADI+ F7	Apis mellifera	DWV-B injected	2022-08-24	T3	10	2022-09-03	faeces	12	108	13.33	0.193	78.5
ADI+ F8	Apis mellifera	DWV-B injected	2022-08-24	T3	10	2022-09-03	faeces	14	126	13.25	0.059	78.5
ADI+ F9	Apis mellifera	DWV-B injected	2022-08-24	T3	10	2022-09-03	faeces	8	72	13.91	0.124	78.5
ADI+ F10	Apis mellifera	DWV-B injected	2022-08-24	T3	10	2022-09-03	faeces	10	90	18.31	0.003	78.5
ADI+ F11	Apis mellifera	DWV-B injected	2022-08-24	T3	10	2022-09-03	faeces	5	45	14.25	0.01	78.5
positive control: Faeces from untreated Bombus spiked with 5x107 GEs. Cq = 13.29; Tm = 78.5
BDIC F1	Bombus terrestris	Control injected	2022-09-19	T1	3	2022-09-22	faeces	3	27	N/A	-	-
BDIC F2	Bombus terrestris	Control injected	2022-09-19	T1	3	2022-09-22	faeces	5	45	34	1.469	78.5
BDIC F3	Bombus terrestris	Control injected	2022-09-22	T1	3	2022-09-25	faeces	12	108	34.74	0.432	78.5
BDIC F4	Bombus terrestris	Control injected	2022-09-22	T1	3	2022-09-25	faeces	6.5	58.5	35.4	1.479	78.5
BDIC F5	Bombus terrestris	Control injected	2022-09-19	T2	6	2022-09-25	faeces	20	180	36.33	0	78.5
BDIC F6	Bombus terrestris	Control injected	2022-09-19	T2	6	2022-09-25	faeces	16	144	35.5	0.013	78.5
BDIC F7	Bombus terrestris	Control injected	2022-09-19	T2	6	2022-09-25	faeces	4	36	36.52	0.212	78.5, 77
BDIC F8	Bombus terrestris	Control injected	2022-09-22	T2	6	2022-09-28	faeces	20	180	34.91	0	78.5
BDIC F9	Bombus terrestris	Control injected	2022-09-22	T2	6	2022-09-28	faeces	20	180	35.46	1.43	78.5
BDIC F10	Bombus terrestris	Control injected	2022-09-19	T3	10	2022-09-29	faeces	2	18	34.27	0.776	78.5
BDIC F11	Bombus terrestris	Control injected	2022-09-19	T3	10	2022-09-29	faeces	20	180	33.06	0.034	78.5
BDIC F12	Bombus terrestris	Control injected	2022-09-19	T3	10	2022-09-29	faeces	5	45	34.14	0.189	78.5
BDIC F13	Bombus terrestris	Control injected	2022-09-19	T3	10	2022-09-29	faeces	7	63	35.16	0	78.5
BDIC F14	Bombus terrestris	Control injected	2022-09-19	T3	10	2022-09-29	faeces	19	171	36.29	0	78.5
BDIC F15	Bombus terrestris	Control injected	2022-09-22	T3	10	2022-10-02	faeces	20	180	35.23	0	78.5
BDIC F16	Bombus terrestris	Control injected	2022-09-22	T3	10	2022-10-02	faeces	20	180	36.35	0.64	78.5
BDIC F17	Bombus terrestris	Control injected	2022-09-22	T3	10	2022-10-02	faeces	8	72	34.99	0.865	78.5
BDI+ F1	Bombus terrestris	DWV-B injected	2022-09-19	T1	3	2022-09-22	faeces	0.5	4.5	33.5	0.302	78.5
BDI+ F2	Bombus terrestris	DWV-B injected	2022-09-19	T1	3	2022-09-22	faeces	1	9	27.42	0.02	78.5
BDI+ F3	Bombus terrestris	DWV-B injected	2022-09-19	T1	3	2022-09-22	faeces	2	18	31.17	0.071	78.5
BDI+ F4	Bombus terrestris	DWV-B injected	2022-09-22	T1	3	2022-09-25	faeces	20	180	31.05	0.153	78.5
BDI+ F5	Bombus terrestris	DWV-B injected	2022-09-22	T1	3	2022-09-25	faeces	15	135	30.38	0.126	78.5
BDI+ F6	Bombus terrestris	DWV-B injected	2022-09-22	T1	3	2022-09-25	faeces	5	45	31.85	0.355	78.5
BDI+ F7	Bombus terrestris	DWV-B injected	2022-09-19	T2	6	2022-09-25	faeces	7	63	32.78	0.358	78.5
BDI+ F8	Bombus terrestris	DWV-B injected	2022-09-19	T2	6	2022-09-25	faeces	8	72	29.02	0.083	78.5
BDI+ F9	Bombus terrestris	DWV-B injected	2022-09-19	T2	6	2022-09-25	faeces	9	81	30.98	0.216	78.5
BDI+ F10	Bombus terrestris	DWV-B injected	2022-09-19	T2	6	2022-09-25	faeces	16	144	33.87	0.755	78.5
BDI+ F11	Bombus terrestris	DWV-B injected	2022-09-22	T2	6	2022-09-28	faeces	3.5	31.5	31.35	0.239	78.5
BDI+ F12	Bombus terrestris	DWV-B injected	2022-09-22	T2	6	2022-09-28	faeces	3.5	31.5	29.97	0.262	78.5
BDI+ F13	Bombus terrestris	DWV-B injected	2022-09-19	T3	10	2022-09-29	faeces	4	36	29.05	0.006	78
BDI+ F14	Bombus terrestris	DWV-B injected	2022-09-19	T3	10	2022-09-29	faeces	16	144	32.64	0.286	78.5
BDI+ F15	Bombus terrestris	DWV-B injected	2022-09-19	T3	10	2022-09-29	faeces	14	126	33.67	0.473	78.5
BDI+ F16	Bombus terrestris	DWV-B injected	2022-09-19	T3	10	2022-09-29	faeces	6	54	33.97	1.005	78
BDI+ F17	Bombus terrestris	DWV-B injected	2022-09-19	T3	10	2022-09-29	faeces	5	45	33.37	0.515	78.5
BDI+ F18	Bombus terrestris	DWV-B injected	2022-09-22	T3	10	2022-10-02	faeces	20	180	35.29	0.102	78.5
BDI+ F19	Bombus terrestris	DWV-B injected	2022-09-22	T3	10	2022-10-02	faeces	7	63	30.78	0.024	78.5
BDI+ F20	Bombus terrestris	DWV-B injected	2022-09-22	T3	10	2022-10-02	faeces	4	36	34.02	0.371	78.5
positive control: Faeces from untreated Bombus spiked with 5x107 GEs. Cq = 13.68; Tm = 78.5

## Sheet: Raw data Fig. 3
Data Fig.3:
Sample name	Species	Treatment	Inoculation date	Time point	dpi	Sampling date	Sample type	DWV-B Cqmean	CqStdDev	Melt temperature
ACDF H1	Apis mellifera	untreated	-	T0	0	2022-08-23	haemolymph	N/A	-	-
ACDF H2	Apis mellifera	untreated	-	T0	0	2022-08-23	haemolymph	N/A	-	-
ACDF H3	Apis mellifera	untreated	-	T0	0	2022-08-23	haemolymph	N/A	-	-
ACDF H4	Apis mellifera	untreated	-	T0	0	2022-08-23	haemolymph	N/A	-	-
ACDF H5	Apis mellifera	untreated	-	T0	0	2022-08-23	haemolymph	N/A	-	-
ACDF H6	Apis mellifera	untreated	-	T0	0	2022-08-23	haemolymph	N/A	-	-
ACDF H7	Apis mellifera	Control fed	2022-08-23	T1	2	2022-08-25	haemolymph	N/A	-	-
ACDF H8	Apis mellifera	Control fed	2022-08-23	T1	2	2022-08-25	haemolymph	N/A	-	-
ACDF H9	Apis mellifera	Control fed	2022-08-23	T1	2	2022-08-25	haemolymph	N/A	-	-
ACDF H10	Apis mellifera	Control fed	2022-08-23	T2	6	2022-08-29	haemolymph	N/A	-	-
ACDF H11	Apis mellifera	Control fed	2022-08-23	T2	6	2022-08-29	haemolymph	N/A	-	-
ACDF H12	Apis mellifera	Control fed	2022-08-23	T2	6	2022-08-29	haemolymph	N/A	-	-
ACDF H13	Apis mellifera	Control fed	2022-08-23	T3	10	2022-09-02	haemolymph	N/A	-	-
ACDF H14	Apis mellifera	Control fed	2022-08-23	T3	10	2022-09-02	haemolymph	N/A	-	-
ACDF H15	Apis mellifera	Control fed	2022-08-23	T3	10	2022-09-02	haemolymph	N/A	-	-
ADF H1	Apis mellifera	DWV-B fed	2022-08-23	T1	2	2022-08-25	haemolymph	23.02	0.005	78.5
ADF H2	Apis mellifera	DWV-B fed	2022-08-23	T1	2	2022-08-25	haemolymph	22.4	0.215	78.5
ADF H3	Apis mellifera	DWV-B fed	2022-08-23	T1	2	2022-08-25	haemolymph	N/A	-	-
ADF H4	Apis mellifera	DWV-B fed	2022-08-23	T2	6	2022-08-29	haemolymph	8.56	0.386	78.5
ADF H5	Apis mellifera	DWV-B fed	2022-08-23	T2	6	2022-08-29	haemolymph	10.12	0.017	78.5
ADF H6	Apis mellifera	DWV-B fed	2022-08-23	T2	6	2022-08-29	haemolymph	7.63	0.005	78.5
ADF H7	Apis mellifera	DWV-B fed	2022-08-23	T3	10	2022-09-02	haemolymph	18.53	0.07	78.5
ADF H8	Apis mellifera	DWV-B fed	2022-08-23	T3	10	2022-09-02	haemolymph	11.23	0.132	78.5
ADF H9	Apis mellifera	DWV-B fed	2022-08-23	T3	10	2022-09-02	haemolymph	21.14	0.176	78.5
positive control: Apis injected with 107, hemolymph was collected at 2 dpi (T1). Dilution 1:100. Cqmean = 14.37; Tm = 78.5
BDUT H1	Bombus terrestris	untreated	-	T0	0	2022-09-19	haemolymph	N/A	-	-
BDUT H2	Bombus terrestris	untreated	-	T0	0	2022-09-19	haemolymph	N/A	-	-
BDUT H3	Bombus terrestris	untreated	-	T0	0	2022-09-19	haemolymph	N/A	-	-
CWF H1	Bombus terrestris	Control fed	2022-09-19	T1	3	2022-09-22	haemolymph	N/A	-	-
CWF H2	Bombus terrestris	Control fed	2022-09-19	T1	3	2022-09-22	haemolymph	N/A	-	-
CWF H3	Bombus terrestris	Control fed	2022-09-19	T1	3	2022-09-22	haemolymph	N/A	-	-
CWF H4	Bombus terrestris	Control fed	2022-09-22	T1	3	2022-09-25	haemolymph	N/A	-	-
CWF H5	Bombus terrestris	Control fed	2022-09-22	T1	3	2022-09-25	haemolymph	N/A	-	-
CWF H6	Bombus terrestris	Control fed	2022-09-19	T2	6	2022-09-25	haemolymph	N/A	-	-
CWF H7	Bombus terrestris	Control fed	2022-09-19	T2	6	2022-09-25	haemolymph	N/A	-	-
CWF H8	Bombus terrestris	Control fed	2022-09-19	T2	6	2022-09-25	haemolymph	N/A	-	-
CWF H9	Bombus terrestris	Control fed	2022-09-19	T2	6	2022-09-25	haemolymph	N/A	-	-
CWF H10	Bombus terrestris	Control fed	2022-09-22	T2	6	2022-09-28	haemolymph	N/A	-	-
CWF H11	Bombus terrestris	Control fed	2022-09-22	T2	6	2022-09-28	haemolymph	N/A	-	-
CWF H12	Bombus terrestris	Control fed	2022-09-19	T3	10	2022-09-29	haemolymph	N/A	-	-
CWF H13	Bombus terrestris	Control fed	2022-09-19	T3	10	2022-09-29	haemolymph	N/A	-	-
CWF H14	Bombus terrestris	Control fed	2022-09-19	T3	10	2022-09-29	haemolymph	N/A	-	-
CWF H15	Bombus terrestris	Control fed	2022-09-19	T3	10	2022-09-29	haemolymph	N/A	-	-
CWF H16	Bombus terrestris	Control fed	2022-09-19	T3	10	2022-09-29	haemolymph	N/A	-	-
CWF H17	Bombus terrestris	Control fed	2022-09-19	T3	10	2022-09-29	haemolymph	N/A	-	-
CWF H18	Bombus terrestris	Control fed	2022-09-22	T3	10	2022-10-02	haemolymph	N/A	-	-
CWF H19	Bombus terrestris	Control fed	2022-09-22	T3	10	2022-10-02	haemolymph	N/A	-	-
CWF H20	Bombus terrestris	Control fed	2022-09-22	T3	10	2022-10-02	haemolymph	N/A	-	-
CWF H21	Bombus terrestris	Control fed	2022-09-22	T3	10	2022-10-02	haemolymph	N/A	-	-
DWF H1	Bombus terrestris	DWV-B fed	2022-09-19	T1	3	2022-09-22	haemolymph	N/A	-	-
DWF H2	Bombus terrestris	DWV-B fed	2022-09-19	T1	3	2022-09-22	haemolymph	N/A	-	-
DWF H3	Bombus terrestris	DWV-B fed	2022-09-19	T1	3	2022-09-22	haemolymph	N/A	-	-
DWF H4	Bombus terrestris	DWV-B fed	2022-09-22	T1	3	2022-09-25	haemolymph	N/A	-	-
DWF H5	Bombus terrestris	DWV-B fed	2022-09-22	T1	3	2022-09-25	haemolymph	N/A	-	-
DWF H6	Bombus terrestris	DWV-B fed	2022-09-19	T2	6	2022-09-25	haemolymph	N/A	-	-
DWF H7	Bombus terrestris	DWV-B fed	2022-09-19	T2	6	2022-09-25	haemolymph	N/A	-	-
DWF H8	Bombus terrestris	DWV-B fed	2022-09-19	T2	6	2022-09-25	haemolymph	N/A	-	-
DWF H9	Bombus terrestris	DWV-B fed	2022-09-19	T2	6	2022-09-25	haemolymph	N/A	-	-
DWF H11	Bombus terrestris	DWV-B fed	2022-09-22	T2	6	2022-09-28	haemolymph	N/A	-	-
DWF H13	Bombus terrestris	DWV-B fed	2022-09-19	T3	10	2022-09-29	haemolymph	N/A	-	-
DWF H14	Bombus terrestris	DWV-B fed	2022-09-19	T3	10	2022-09-29	haemolymph	N/A	-	-
DWF H16	Bombus terrestris	DWV-B fed	2022-09-19	T3	10	2022-09-29	haemolymph	N/A	-	-
DWF H17	Bombus terrestris	DWV-B fed	2022-09-22	T3	10	2022-10-02	haemolymph	N/A	-	-
DWF H18	Bombus terrestris	DWV-B fed	2022-09-22	T3	10	2022-10-02	haemolymph	N/A	-	-
DWF H19	Bombus terrestris	DWV-B fed	2022-09-22	T3	10	2022-10-02	haemolymph	N/A	-	-
DWF H20	Bombus terrestris	DWV-B fed	2022-09-22	T3	10	2022-10-02	haemolymph	N/A	-	-
DWF H21	Bombus terrestris	DWV-B fed	2022-09-22	T3	10	2022-10-02	haemolymph	N/A	-	-
DWF H22	Bombus terrestris	DWV-B fed	2022-09-22	T3	10	2022-10-02	haemolymph	N/A	-	-
positive control: Bombus injected with 107, hemolymph was collected at 3 dpi (T1). Dilution 1:100. Cqmean = 23.4; Tm = 78.5
positive control to verify that DWV-B can be detected in the hemolymph of Bombus terrestris with the here used method
BDUT H1	Bombus terrestris	untreated		T0	0	2022-09-19	haemolymph	N/A	-	-
BDUT H2	Bombus terrestris	untreated		T0	0	2022-09-19	haemolymph	N/A	-	-
BDUT H3	Bombus terrestris	untreated		T0	0	2022-09-19	haemolymph	N/A	-	-
BDI+ H1	Bombus terrestris	DWV-B injected	2022-09-22	T0	1-2h	2022-09-22	haemolymph	24.04	0.084	79
BDI+ H2	Bombus terrestris	DWV-B injected	2022-09-22	T0	1-2h	2022-09-22	haemolymph	24.31	0.245	79
BDI+ H3	Bombus terrestris	DWV-B injected	2022-09-22	T0	1-2h	2022-09-22	haemolymph	25.2	0.11	79.0; 78.5
